# Supplementary material for: Relationship between Recovery from COVID-19-Induced Smell Loss and General and Oral Health Factors
Source: MDPI journal article supplement (doi:10.3390/medicina58020283), 2022-02-14
Supplement: s1 [file s1]

*Supplementary Material*

# Relationship between Recovery of COVID-19 Induced Smell and Taste Loss and General and Oral Health Factors

Georgia Catton and Alexander Gardner \*

Department of Restorative Dentistry, Dundee Dental Hospital and School, University of Dundee, Dundee DD1 4HR, UK; g.s.catton@dundee.ac.uk

\* Correspondence: agardner001@dundee.ac.uk

## Supplementary Data S1: Information for participants and questionnaire.

**Study Description:** We are conducting a survey of the loss of taste and smell in people who have experienced COVID-19 infection. This is a short survey that takes about five minutes to complete. It is open to anyone over the age of 18 who has been diagnosed with COVID-19 or suspected symptomatic COVID-19 and who can read and write in English. **Even if you did not experience any loss of taste and smell your participation is extremely valuable.**

It is hoped that the resulting data can allow further insight into the significance of loss of taste and smell as symptoms of COVID-19 infection.

**Study Link:** <https://dundee.onlinesurveys.ac.uk/covid-19-smell-and-taste-questionnaire>

**Disclaimer (ethical/legal):** All responses are anonymous and entirely voluntary. We do not collect any identifiable data. Once a survey has been completed it is no longer possible to remove the data from the master list as no identifiers will be present. Data will be stored confidentially and securely in accordance with University of Dundee data security and GDPR regulations. Data will not be accessible to those out with the research team. Data may be shared with other academics for purposes of future research. In this event data will be shared securely with a data transfer agreement in place. This study has been approved by the University of Dundee Schools of Nursing & Health Sciences and Dentistry Research Ethics Committee, application number: UOD\SDEN\STAFF\2020\017.

End Date: Open

1. How was your diagnosis of COVID-19 made?

- Self-diagnosed
- Diagnosed by a doctor
- Diagnosed by a positive PCR test

2. At the time of illness, what was your age in years?

3. What is your sex?

- Male
- Female

4. What is your ethnicity?

5. How would you rate the severity of your illness from 0 to 10?

(0 = no symptoms, 10 = most severe illness imaginable)

[illegible]

17. Prior to your illness, how would you care for your teeth?

- How often would you brush your teeth?
- What toothpaste would you use?
- How often would you floss?

18. Prior to your illness, had you lost any teeth? If so, how many, and why were they lost?

19. Prior to your illness, how many fillings did you have?

- no fillings
- one to five fillings
- five to ten fillings
- more than ten fillings

20. Prior to your illness, did you wear any oral appliances?

- none
- upper retainer
- lower retainer
- upper and lower retainer
- upper denture
- lower denture
- upper and lower denture

**Supplementary Table S1:** Comparison of short ( $\leq 28$  days) and long ( $> 28$  days) smell and taste loss only on participants with confirmed PCR test ( $n=118$ ). For Fisher's exact test and Chi2 test observed values are shown followed by expected values in brackets.

| Comparison of short ( $\leq 28$ days) and long ( $> 28$ days) smell loss |                |                           |                          |                |         |
|--------------------------------------------------------------------------|----------------|---------------------------|--------------------------|----------------|---------|
| Variable                                                                 | Test           | Distributions             |                          | Test-statistic | p-value |
|                                                                          |                | Short (Mean $\pm$ 95% CI) | Long (Mean $\pm$ 95% CI) |                |         |
| Age                                                                      | t-test         | 29.36 (27.55 – 31.17)     | 34.25 (30.12 – 38.38)    | -2.49          | 0.014   |
| Illness severity                                                         | Mann-Whitney   | 3.93 (3.51 – 4.35)        | 5.34 (4.69 – 5.99)       | -3.37          | 0.001   |
| Flossing                                                                 | Fisher's exact | No                        | 15 (19.2)                | NA             | 0.042   |
|                                                                          |                | Yes                       | 64 (59.8)                |                |         |
|                                                                          |                | No                        | 13 (8.8)                 |                |         |
|                                                                          |                | Yes                       | 23 (27.2)                |                |         |
